# Supplementary figures and images for: Assignment of Colletotrichum coccodes isolates into vegetative compatibility groups using infrared spectroscopy: a step towards practical application
Source: Royal Society of Chemistry journal article supplement (doi:10.1039/c5an00213c), 2015-01-01

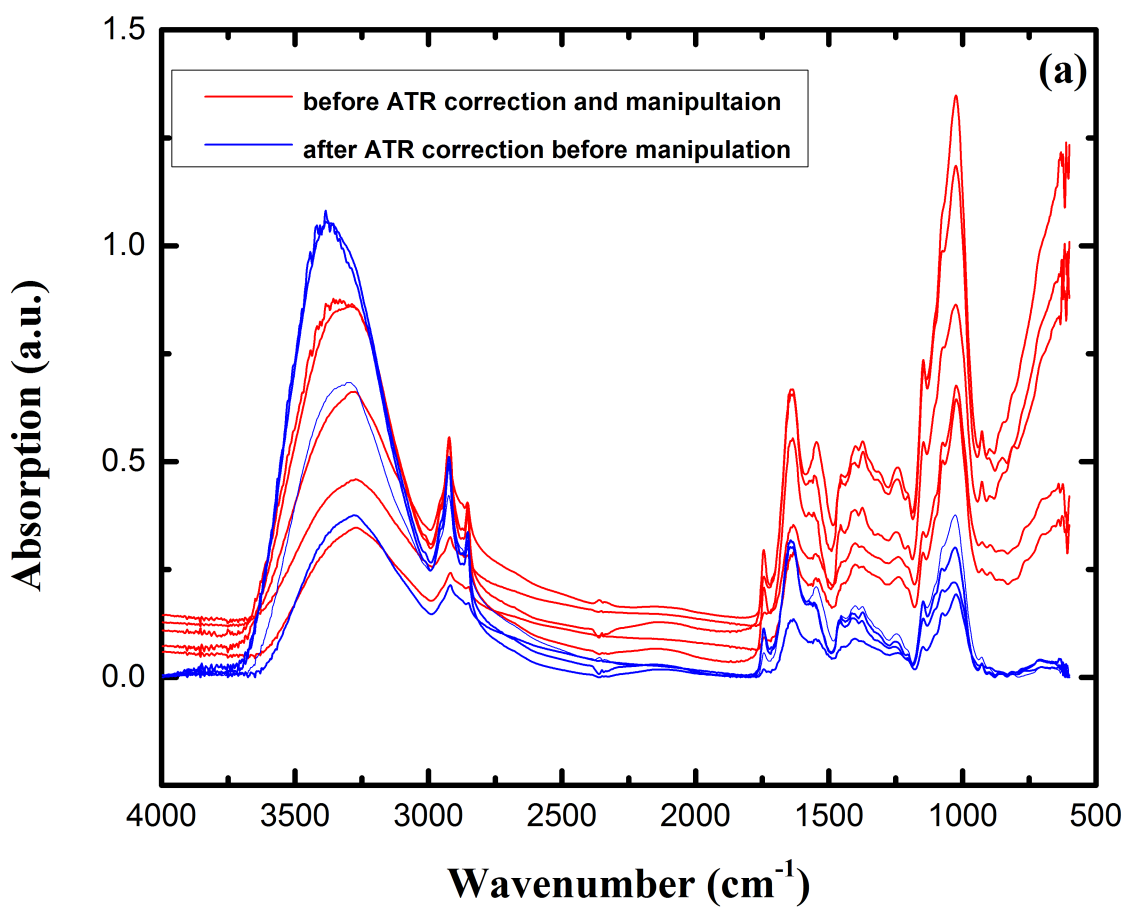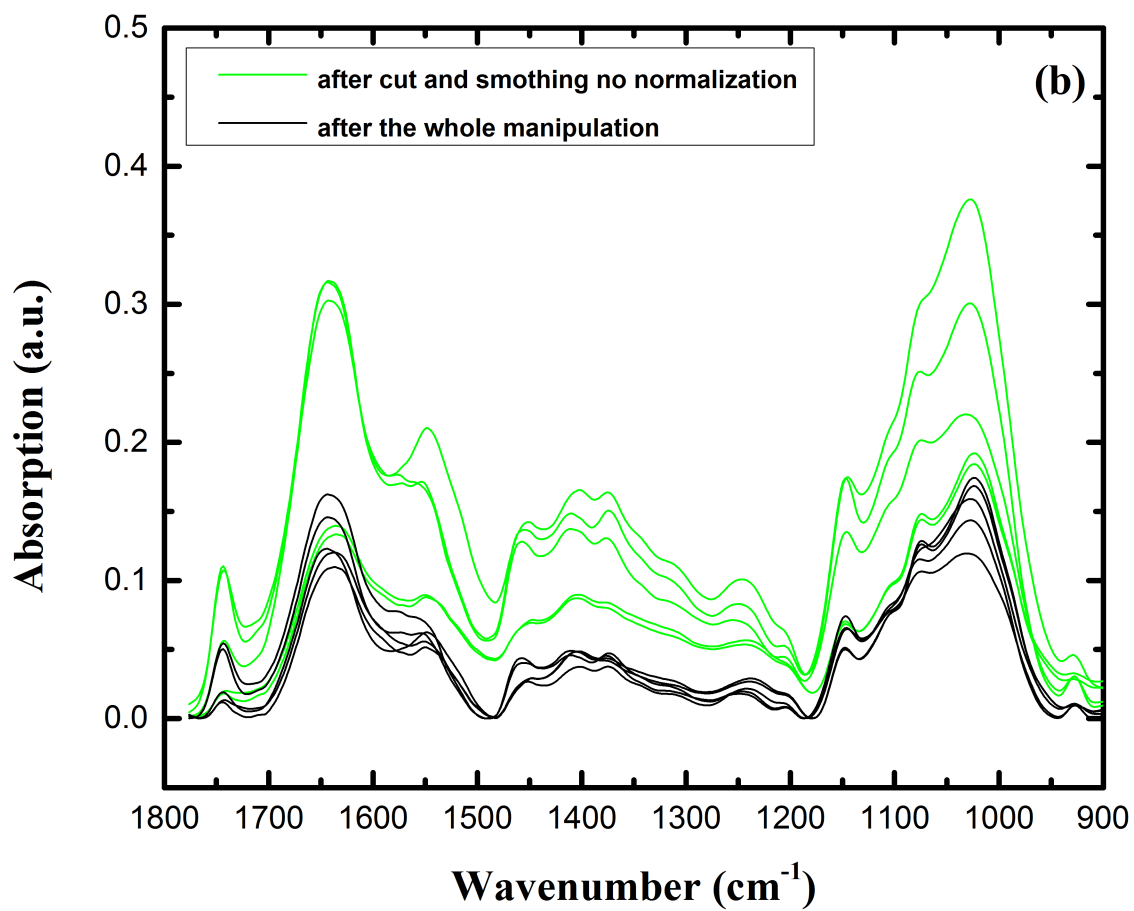

Supplement: c5an00213c1.pdf [file c5an00213c1.pdf]
